# Supplementary material for: Clinical Trajectory and Risk Stratification for Heart Failure with Preserved Ejection Fraction in a Real-World Cohort of Patients with Suspected Coronary Artery Disease
Source: MDPI journal article supplement (doi:10.3390/jcm13072092), 2024-04-03

## Supplementary Material

---

### **Clinical trajectory and risk-stratification for heart failure with preserved ejection fraction in a real-world cohort of patients with suspected coronary artery disease**

Guglielmo Gioia, MD<sup>1</sup>; Karl-Patrik Kresoja, MD<sup>1</sup>; Sebastian Rosch, MD<sup>1</sup>; Anne Schöber, MD<sup>1</sup>; Elias Harnisch, BSc<sup>1</sup>; Maximilian von Roeder, MD<sup>1</sup>; Markus Scholz, MD<sup>2,3</sup>; Sylvia Henger, MSc<sup>3</sup>; Berend Isermann, MD<sup>4</sup>; Holger Thiele, MD<sup>1</sup>; Philipp Lurz, MD, PhD<sup>5</sup>; Karl-Philipp Rommel, MD<sup>1,6</sup>

<sup>1</sup>Dept. of Cardiology, Heart Center at University Leipzig and Leipzig Heart Science, Leipzig, Germany

<sup>2</sup>LIFE – Leipzig Research Center for Civilization Diseases, University of Leipzig, Germany.

<sup>3</sup>Institute of Medical Informatics, Statistic and Epidemiology, University of Leipzig, Germany.

<sup>4</sup>Institute of Laboratory Medicine, Clinical Chemistry and Molecular Diagnostics, University Hospital Leipzig, Germany

<sup>5</sup>Dept. Of Cardiology, University Hospital Mainz, Mainz, Germany

<sup>6</sup>Cardiovascular Research Foundation, New York, New York, USA

**Correspondence address:**

Karl-Philipp Rommel, MD  
Department of Internal Medicine/Cardiology  
Heart Center Leipzig at University of Leipzig  
Strümpellstraße 39, 04289 Leipzig, GERMANY  
Phone: +49141865252583  
karl-philip.rommel@medizin.uni-leipzig.de

## Supplementary Tables / Figures

Table S1. Baseline characteristics of patients with isolated HFpEF and stratification according to H<sub>2</sub>FPEF Score in the cohort of isolated HFpEF.

| Variables                                                                                                                                                                                                                                                                                                                                                                                                                                                                                                               | All Patients<br>with isolated HFpEF<br>n=499                     | H <sub>2</sub> FPEF<br>Low-Risk<br>n=109                   | H <sub>2</sub> FPEF<br>Intermediate-Risk<br>n=280                | H <sub>2</sub> FPEF<br>High-Risk<br>n=110                      | p-value |
|-------------------------------------------------------------------------------------------------------------------------------------------------------------------------------------------------------------------------------------------------------------------------------------------------------------------------------------------------------------------------------------------------------------------------------------------------------------------------------------------------------------------------|------------------------------------------------------------------|------------------------------------------------------------|------------------------------------------------------------------|----------------------------------------------------------------|---------|
| <b>Patient Characteristics</b>                                                                                                                                                                                                                                                                                                                                                                                                                                                                                          |                                                                  |                                                            |                                                                  |                                                                |         |
| Age, years                                                                                                                                                                                                                                                                                                                                                                                                                                                                                                              | 65 ± 10                                                          | 58 ± 10                                                    | 67 ± 9                                                           | 69 ± 7                                                         | <0.01   |
| Female sex, n. (%)                                                                                                                                                                                                                                                                                                                                                                                                                                                                                                      | 246 (49%)                                                        | 54 (50%)                                                   | 148 (53%)                                                        | 44 (40%)                                                       | 0.07    |
| NYHA class, n. (%)                                                                                                                                                                                                                                                                                                                                                                                                                                                                                                      | NYHA II: 466 (93.4%)<br>NYHA III: 32 (6.4%)<br>NYHA IV: 1 (0.2%) | NYHA II: 109 (100%)<br>NYHA III: 0 (0%)<br>NYHA IV: 0 (0%) | NYHA II: 267 (95.4%)<br>NYHA III: 12 (4.2%)<br>NYHA IV: 1 (0.4%) | NYHA II: 90 (81.8%)<br>NYHA III: 20 (18.2%)<br>NYHA IV: 0 (0%) | <0.01   |
| Chest pain, n. (%)                                                                                                                                                                                                                                                                                                                                                                                                                                                                                                      | 207 (41%)                                                        | 62 (57%)                                                   | 108 (39%)                                                        | 37 (34%)                                                       | <0.01   |
| BMI, kg/m <sup>2</sup>                                                                                                                                                                                                                                                                                                                                                                                                                                                                                                  | 31 ± 5                                                           | 28 ± 4                                                     | 32 ± 5                                                           | 32 ± 5                                                         | <0.01   |
| Obesity, n. (%)                                                                                                                                                                                                                                                                                                                                                                                                                                                                                                         | 254 (51%)                                                        | 19 (17%)                                                   | 165 (59%)                                                        | 70 (64%)                                                       | <0.01   |
| Diabetes, n. (%)                                                                                                                                                                                                                                                                                                                                                                                                                                                                                                        | 182 (36%)                                                        | 19 (17%)                                                   | 105 (38%)                                                        | 58 (53%)                                                       | <0.01   |
| Arterial hypertension, n. (%)                                                                                                                                                                                                                                                                                                                                                                                                                                                                                           | 302 (61%)                                                        | 61 (56%)                                                   | 177 (63%)                                                        | 64 (58%)                                                       | 0.36    |
| Smoking, n. (%)                                                                                                                                                                                                                                                                                                                                                                                                                                                                                                         | 106 (21%)                                                        | 22 (20%)                                                   | 50 (18%)                                                         | 34 (31%)                                                       | 0.87    |
| Hx CAD intervention, n. (%)                                                                                                                                                                                                                                                                                                                                                                                                                                                                                             | 18 (4%)                                                          | 2 (2%)                                                     | 11 (4%)                                                          | 5 (5%)                                                         | 0.51    |
| Atrial fibrillation, n. (%)                                                                                                                                                                                                                                                                                                                                                                                                                                                                                             | 148 (30%)                                                        | 0 (0%)                                                     | 38 (14%)                                                         | 110 (100%)                                                     | <0.01   |
| <b>Laboratory Values</b>                                                                                                                                                                                                                                                                                                                                                                                                                                                                                                |                                                                  |                                                            |                                                                  |                                                                |         |
| eGFR, ml/min/1.73m <sup>2</sup>                                                                                                                                                                                                                                                                                                                                                                                                                                                                                         | 68 ± 25                                                          | 74 ± 24                                                    | 66 ± 25                                                          | 65 ± 24                                                        | <0.01   |
| eGFR <30, n. (%)                                                                                                                                                                                                                                                                                                                                                                                                                                                                                                        | 19 (4%)                                                          | 0 (0%)                                                     | 11 (4%)                                                          | 8 (7%)                                                         | 0.02    |
| NT-proBNP, ng/l                                                                                                                                                                                                                                                                                                                                                                                                                                                                                                         | 262 (172 - 510)                                                  | 200 (155 - 323)                                            | 251 (177 - 490)                                                  | 480 (230 - 1276)                                               | <0.01   |
| CRP, mg/l                                                                                                                                                                                                                                                                                                                                                                                                                                                                                                               | 2.3 (1.2-5)                                                      | 1.8 (1-4)                                                  | 2.5 (1.3-5)                                                      | 2.8 (1.4-6.3)                                                  | <0.01   |
| Troponin T, pg/ml                                                                                                                                                                                                                                                                                                                                                                                                                                                                                                       | 10.3 (6 - 12)                                                    | 7.5 (4.5 - 10.8)                                           | 10.5 (6.0 - 11.8)                                                | 10.8 (8.6 - 14.4)                                              | <0.01   |
| <b>Echocardiographic Parameters</b>                                                                                                                                                                                                                                                                                                                                                                                                                                                                                     |                                                                  |                                                            |                                                                  |                                                                |         |
| LV-EF, %                                                                                                                                                                                                                                                                                                                                                                                                                                                                                                                | 61 ± 7                                                           | 60 ± 6                                                     | 62 ± 6                                                           | 61 ± 7                                                         | 0.21    |
| E/e'                                                                                                                                                                                                                                                                                                                                                                                                                                                                                                                    | 10.5 ± 3.7                                                       | 8 ± 2.7                                                    | 10.75 ± 3.3                                                      | 12.3 ± 3.3                                                     | <0.01   |
| LV-EDV index, ml/m <sup>2</sup>                                                                                                                                                                                                                                                                                                                                                                                                                                                                                         | 51 ± 18                                                          | 54 ± 18                                                    | 50 ± 17                                                          | 49 ± 18                                                        | 0.05    |
| LV-Mass index, g/m <sup>2</sup>                                                                                                                                                                                                                                                                                                                                                                                                                                                                                         | 138.5 ± 40                                                       | 137 ± 23                                                   | 138 ± 40                                                         | 140 ± 39                                                       | 0.86    |
| LA diameter index, mm/m <sup>2</sup>                                                                                                                                                                                                                                                                                                                                                                                                                                                                                    | 24 ± 3.7                                                         | 23.72 ± 3.7                                                | 24 ± 3.5                                                         | 26 ± 4                                                         | <0.01   |
| TR Vmax, m/s                                                                                                                                                                                                                                                                                                                                                                                                                                                                                                            | 2.5 ± 0.7                                                        | 2.32 ± 0.4                                                 | 2.52 ± 0.9                                                       | 2.57 ± 0.4                                                     | 0.02    |
| Moderate valvular disease, n. (%)                                                                                                                                                                                                                                                                                                                                                                                                                                                                                       | 45 (9%)                                                          | 4 (4%)                                                     | 23 (8%)                                                          | 18 (16%)                                                       | <0.01   |
| <b>Events during follow-up</b>                                                                                                                                                                                                                                                                                                                                                                                                                                                                                          |                                                                  |                                                            |                                                                  |                                                                |         |
| HF rehospitalization, n. (%)                                                                                                                                                                                                                                                                                                                                                                                                                                                                                            | 88 (18%)                                                         | 8 (7%)                                                     | 41 (15%)                                                         | 39 (35%)                                                       | <0.01   |
| Average number of rehospitalizations, n.                                                                                                                                                                                                                                                                                                                                                                                                                                                                                | 0.46 ± 1.2                                                       | 0.2 ± 0.5                                                  | 0.4 ± 1.17                                                       | 0.9 ± 1.4                                                      | <0.01   |
| All-cause mortality, n. (%)                                                                                                                                                                                                                                                                                                                                                                                                                                                                                             | 57 (11%)                                                         | 4 (4%)                                                     | 31 (11%)                                                         | 22 (20%)                                                       | <0.01   |
| NYHA Class = New York Heart Association Class (1-4), BMI = body mass index, CAD = coronary artery disease, HF = heart failure, Hx = history, FU = follow-up, eGFR = estimated glomerular filtration rate, LV-EF = left ventricular ejection fraction, LV-EDV = left ventricular enddiastolic volume, LA = left atrial, TR Vmax = peak velocity of tricuspid valve regurgitation in CW Doppler, TAPSE = tricuspid annular plane systolic excursion. Percentages equal or greater 0.5 were rounded to the larger integer. |                                                                  |                                                            |                                                                  |                                                                |         |

Table S2. *Baseline characteristics of patients with isolated HFpEF and stratification according to H<sub>2</sub>FPEF Score in the cohort of HFpEF with overlapping conditions.*

| Variables                                                                                                                                                                                                                                                                                                                                                                                                                                                                                                               | All Patients<br>HFpEF with<br>overlapping<br>conditions<br>n=555 | H <sub>2</sub> FPEF<br>Low-Risk<br>n=130                      | H <sub>2</sub> FPEF<br>Intermediate-Risk<br>n=323          | H <sub>2</sub> FPEF<br>High-Risk<br>n=102                  | P-value |
|-------------------------------------------------------------------------------------------------------------------------------------------------------------------------------------------------------------------------------------------------------------------------------------------------------------------------------------------------------------------------------------------------------------------------------------------------------------------------------------------------------------------------|------------------------------------------------------------------|---------------------------------------------------------------|------------------------------------------------------------|------------------------------------------------------------|---------|
| <b>Patient Characteristics</b>                                                                                                                                                                                                                                                                                                                                                                                                                                                                                          |                                                                  |                                                               |                                                            |                                                            |         |
| Age, years                                                                                                                                                                                                                                                                                                                                                                                                                                                                                                              | 67 ± 10                                                          | 58.7 ± 11                                                     | 68 ± 6                                                     | 71 ± 4                                                     | <0.01   |
| Female sex, n. (%)                                                                                                                                                                                                                                                                                                                                                                                                                                                                                                      | 175 (32%)                                                        | 30 (23%)                                                      | 108 (33%)                                                  | 37 (36%)                                                   | 0.05    |
| NYHA class, n. (%)                                                                                                                                                                                                                                                                                                                                                                                                                                                                                                      | NYHA II: 511 (92%)<br>NYHA III: 36 (6%)<br>NYHA IV: 8 (2%)       | NYHA II: 124 (95%)<br>NYHA III: 3 (2.5%)<br>NYHA IV: 3 (2.5%) | NYHA II: 301 (93%)<br>NYHA III: 19 (6%)<br>NYHA IV: 3 (1%) | NYHA II: 86 (84%)<br>NYHA III: 14 (14%)<br>NYHA IV: 2 (2%) | <0.01   |
| Chest pain, n. (%)                                                                                                                                                                                                                                                                                                                                                                                                                                                                                                      | 238 (43%)                                                        | 90 (69%)                                                      | 104 (32%)                                                  | 44 (43%)                                                   | <0.01   |
| BMI, kg/m <sup>2</sup>                                                                                                                                                                                                                                                                                                                                                                                                                                                                                                  | 30 ± 5                                                           | 27.5 ± 3.9                                                    | 30.1 ± 4.6                                                 | 30.7 ± 4.8                                                 | <0.01   |
| Obesity, n. (%)                                                                                                                                                                                                                                                                                                                                                                                                                                                                                                         | 233 (42%)                                                        | 16 (12%)                                                      | 159 (49%)                                                  | 58 (57%)                                                   | <0.01   |
| Diabetes, n. (%)                                                                                                                                                                                                                                                                                                                                                                                                                                                                                                        | 189 (34%)                                                        | 24 (18%)                                                      | 112 (35%)                                                  | 53 (52%)                                                   | <0.01   |
| Arterial hypertension, n. (%)                                                                                                                                                                                                                                                                                                                                                                                                                                                                                           | 354 (64%)                                                        | 78 (60%)                                                      | 207 (64%)                                                  | 69 (68%)                                                   | 0.48    |
| Smoking, n. (%)                                                                                                                                                                                                                                                                                                                                                                                                                                                                                                         | 262 (47%)                                                        | 62 (48%)                                                      | 157 (49%)                                                  | 43 (42%)                                                   | 0.52    |
| Hx CAD intervention, n. (%)                                                                                                                                                                                                                                                                                                                                                                                                                                                                                             | 151 (27%)                                                        | 24 (18%)                                                      | 96 (30%)                                                   | 31 (30%)                                                   | 0.04    |
| Atrial fibrillation, n. (%)                                                                                                                                                                                                                                                                                                                                                                                                                                                                                             | 131 (24%)                                                        | 0 (0%)                                                        | 29 (9%)                                                    | 102 (100%)                                                 | <0.01   |
| <b>Laboratory Values</b>                                                                                                                                                                                                                                                                                                                                                                                                                                                                                                |                                                                  |                                                               |                                                            |                                                            |         |
| eGFR, ml/min/1.73m <sup>2</sup>                                                                                                                                                                                                                                                                                                                                                                                                                                                                                         | 64 ± 24                                                          | 76 ± 29                                                       | 60.5 ± 22                                                  | 60.5 ± 21.7                                                | <0.01   |
| eGFR <30, n. (%)                                                                                                                                                                                                                                                                                                                                                                                                                                                                                                        | 32 (6%)                                                          | 5 (4%)                                                        | 22 (7%)                                                    | 5 (5%)                                                     | 0.43    |
| NT-proBNP, ng/l                                                                                                                                                                                                                                                                                                                                                                                                                                                                                                         | 288 (183 - 572)                                                  | 232 (171 - 375)                                               | 283 (183 - 542)                                            | 454 (230 - 1011)                                           | <0.01   |
| CRP, mg/l                                                                                                                                                                                                                                                                                                                                                                                                                                                                                                               | 2.5 (1.2-5.2)                                                    | 2.1 (0.9-4.7)                                                 | 2.5 (1.2-5)                                                | 3.0 (1.6-5.4)                                              | 0.08    |
| Troponin T, pg/ml                                                                                                                                                                                                                                                                                                                                                                                                                                                                                                       | 10.8 (7.2 - 12)                                                  | 8.8 (5.7 - 10.8)                                              | 10.8 (7.8 - 11.7)                                          | 10.8 (8.5 - 14)                                            | <0.01   |
| <b>Echocardiographic Parameters</b>                                                                                                                                                                                                                                                                                                                                                                                                                                                                                     |                                                                  |                                                               |                                                            |                                                            |         |
| LV-EF, %                                                                                                                                                                                                                                                                                                                                                                                                                                                                                                                | 61 ± 6.6                                                         | 60 ± 6                                                        | 61 ± 6.8                                                   | 61.5 ± 6.9                                                 | 0.57    |
| E/e'                                                                                                                                                                                                                                                                                                                                                                                                                                                                                                                    | 10 ± 3.3                                                         | 8 ± 1.9                                                       | 10.6 ± 2.8                                                 | 12.3 ± 3.7                                                 | <0.01   |
| LV-EDV index, ml/m <sup>2</sup>                                                                                                                                                                                                                                                                                                                                                                                                                                                                                         | 54.4 ± 18                                                        | 60.7 ± 18.7                                                   | 53 ± 17                                                    | 50.7 ± 17.8                                                | <0.01   |
| LV-Mass index, g/m <sup>2</sup>                                                                                                                                                                                                                                                                                                                                                                                                                                                                                         | 138 ± 40                                                         | 143 ± 40.6                                                    | 136.4 ± 38.9                                               | 136.7 ± 37.9                                               | 0.25    |
| LA diameter index, mm/m <sup>2</sup>                                                                                                                                                                                                                                                                                                                                                                                                                                                                                    | 24 ± 3.7                                                         | 24 ± 3.1                                                      | 23.3 ± 3.4                                                 | 25 ± 3.4                                                   | <0.01   |
| TR Vmax, m/s                                                                                                                                                                                                                                                                                                                                                                                                                                                                                                            | 2.5 ± 0.4                                                        | 2.3 ± 0.3                                                     | 2.4 ± 0.4                                                  | 2.6 ± 0.4                                                  | <0.01   |
| Moderate valvular disease, n. (%)                                                                                                                                                                                                                                                                                                                                                                                                                                                                                       | 75 (14%)                                                         | 9 (7%)                                                        | 41 (13%)                                                   | 25 (25%)                                                   | <0.01   |
| <b>Events during follow-up</b>                                                                                                                                                                                                                                                                                                                                                                                                                                                                                          |                                                                  |                                                               |                                                            |                                                            |         |
| HF rehospitalization, n. (%)                                                                                                                                                                                                                                                                                                                                                                                                                                                                                            | 140 (25%)                                                        | 18 (14%)                                                      | 78 (24%)                                                   | 44 (43%)                                                   | <0.01   |
| Average number of rehospitalizations, n.                                                                                                                                                                                                                                                                                                                                                                                                                                                                                | 1.78 ± 1.8                                                       | 1.25 ± 1.6                                                    | 1.77 ± 1.8                                                 | 2.5 ± 2.0                                                  | <0.01   |
| All-cause mortality, n. (%)                                                                                                                                                                                                                                                                                                                                                                                                                                                                                             | 62 (11%)                                                         | 8 (6%)                                                        | 33 (10%)                                                   | 21 (21%)                                                   | <0.01   |
| NYHA Class = New York Heart Association Class (1-4), BMI = body mass index, CAD = coronary artery disease, HF = heart failure, Hx = history, FU = follow-up, eGFR = estimated glomerular filtration rate, LV-EF = left ventricular ejection fraction, LV-EDV = left ventricular enddiastolic volume, LA = left atrial, TR Vmax = peak velocity of tricuspid valve regurgitation in CW Doppler, TAPSE = tricuspid annular plane systolic excursion. Percentages equal or greater 0.5 were rounded to the larger integer. |                                                                  |                                                               |                                                            |                                                            |         |

Table S3. Logistic Regression for HF-hospitalization in cohort of patients with HFpEF and overlapping conditions at presentation.

|                                                                                                                                                                                                                                                                                                                                                                                                                                                                                      | Logistic Regression Model (univariate) |       |       |         | Logistic Regression Model (multivariable) |       |       |         |
|--------------------------------------------------------------------------------------------------------------------------------------------------------------------------------------------------------------------------------------------------------------------------------------------------------------------------------------------------------------------------------------------------------------------------------------------------------------------------------------|----------------------------------------|-------|-------|---------|-------------------------------------------|-------|-------|---------|
|                                                                                                                                                                                                                                                                                                                                                                                                                                                                                      | 95.0% CI for EXP(B)                    |       |       | p-value | 95.0% CI for EXP(B)                       |       |       | p-value |
|                                                                                                                                                                                                                                                                                                                                                                                                                                                                                      | EXP(B)                                 | Lower | Upper |         | EXP(B)                                    | Lower | Upper |         |
| Male sex                                                                                                                                                                                                                                                                                                                                                                                                                                                                             | 0.99                                   | 0.65  | 1.50  | 0.98    | 1.12                                      | 0.72  | 1.73  | 0.63    |
| lnNTproBNP                                                                                                                                                                                                                                                                                                                                                                                                                                                                           | 1.07                                   | 0.85  | 1.34  | 0.55    | 1.22                                      | 0.88  | 1.69  | 0.23    |
| NYHA-class                                                                                                                                                                                                                                                                                                                                                                                                                                                                           | 0.59                                   | 0.30  | 1.20  | 0.15    | 0.42                                      | 0.15  | 1.16  | 0.10    |
| H <sub>2</sub> FPEF high-risk                                                                                                                                                                                                                                                                                                                                                                                                                                                        | 2.82                                   | 1.79  | 4.33  | <0.01   | 2.70                                      | 1.65  | 4.41  | <0.01   |
| <p>H<sub>2</sub>FPEF high risk = H<sub>2</sub>FPEF score equal or greater than 6 as binary variable, lnNT-pro-BNP = natural logarithm of the NT-pro-BNP at baseline, NYHA-Class = New York Heart association class (1-4), EXP(B) is considered equivalent to odds ratio. Hosmer and Lemeshow Test p =0.44, Cox &amp; Snell R Square p=0.05, Nagelkerke R Square p= 0.73, Age, Afib, BMI and E/e' were not inputted due to significant co-linearity with H<sub>2</sub>FPEF score.</p> |                                        |       |       |         |                                           |       |       |         |

Table S4. *Logistic Regression for HF-hospitalization in cohort of patients with isolated HFpEF*

|                                                                                                                                                                                                                                                                                                                                                                                                                                                                                       | Logistic Regression Model (univariate) |       |       |         | Logistic Regression Model (multivariable) |       |       |         |
|---------------------------------------------------------------------------------------------------------------------------------------------------------------------------------------------------------------------------------------------------------------------------------------------------------------------------------------------------------------------------------------------------------------------------------------------------------------------------------------|----------------------------------------|-------|-------|---------|-------------------------------------------|-------|-------|---------|
|                                                                                                                                                                                                                                                                                                                                                                                                                                                                                       | 95.0% CI for EXP(B)                    |       |       | p-value | 95.0% CI for EXP(B)                       |       |       | p-value |
|                                                                                                                                                                                                                                                                                                                                                                                                                                                                                       | EXP(B)                                 | Lower | Upper |         | EXP(B)                                    | Lower | Upper |         |
| Male Sex                                                                                                                                                                                                                                                                                                                                                                                                                                                                              | 0.78                                   | 0.49  | 1.24  | 0.30    | 1.09                                      | 0.67  | 1.79  | 0.72    |
| lnNTproBNP                                                                                                                                                                                                                                                                                                                                                                                                                                                                            | 0.97                                   | 0.72  | 1.29  | 0.84    | 0.95                                      | 0.78  | 1.02  | 0.13    |
| NYHA-Class                                                                                                                                                                                                                                                                                                                                                                                                                                                                            | 1.00                                   | 0.41  | 2.42  | 0.99    | 0.61                                      | 0.28  | 1.31  | 0.96    |
| H <sub>2</sub> FPEF high-risk                                                                                                                                                                                                                                                                                                                                                                                                                                                         | 3.81                                   | 2.33  | 6.24  | <0.01   | 5.19                                      | 2.95  | 9.10  | <0.01   |
| H <sub>2</sub> FPEF high risk = H <sub>2</sub> FPEF score equal or greater than 6 as binary variable, lnNT-pro-BNP = natural logarithm of the NT-pro-BNP at baseline, NYHA-Class = New York Heart association class (1-4), EXP(B) is considered equivalent to odds ratio.<br>Hosmer and Lemeshow Test p =0.12, Cox & Snell R Square p=0.07, Nagelkerke R Square p= 0.11,<br>Age, Afib, BMI and E/e' were not inputted due to significant co-linearity with H <sub>2</sub> FPEF score. |                                        |       |       |         |                                           |       |       |         |

Figure S1. *Classification of the overall cohort with detailed reason of hospitalization for the subgroup of HFpEF with overlapping conditions.*

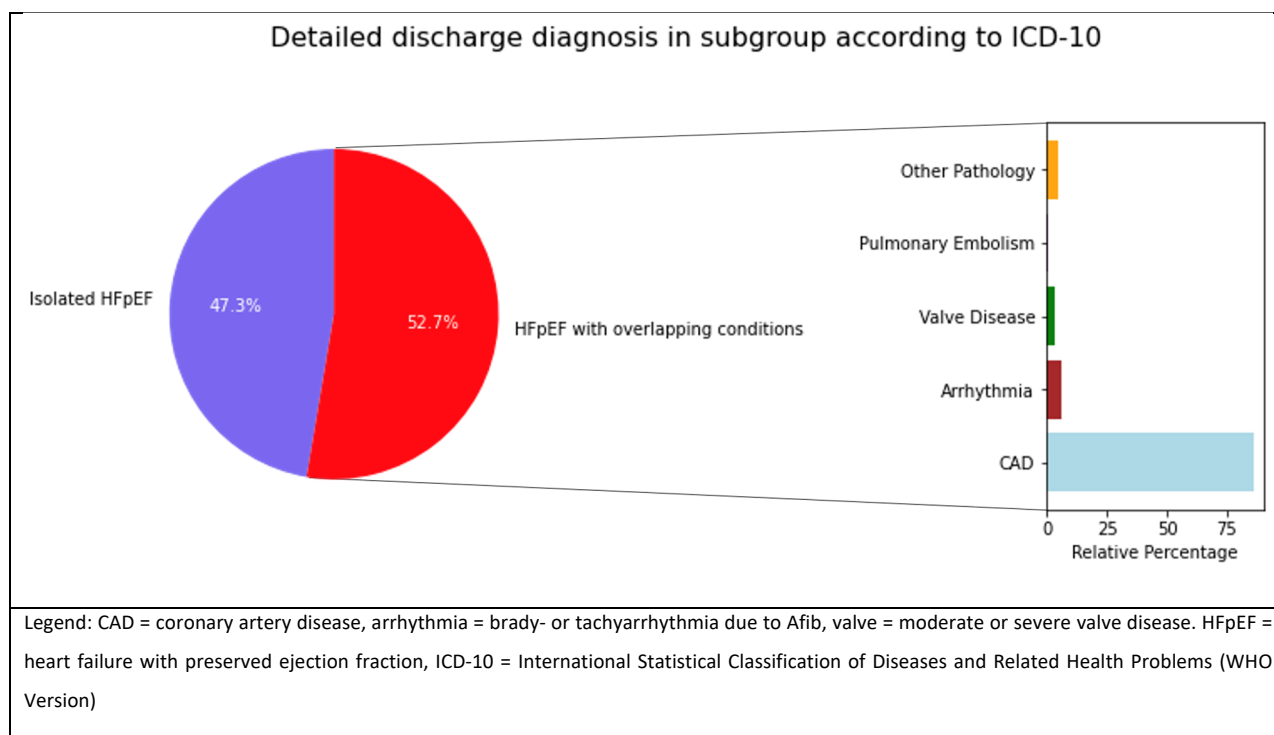

Figure S2. Detailed reasons of first rehospitalization.

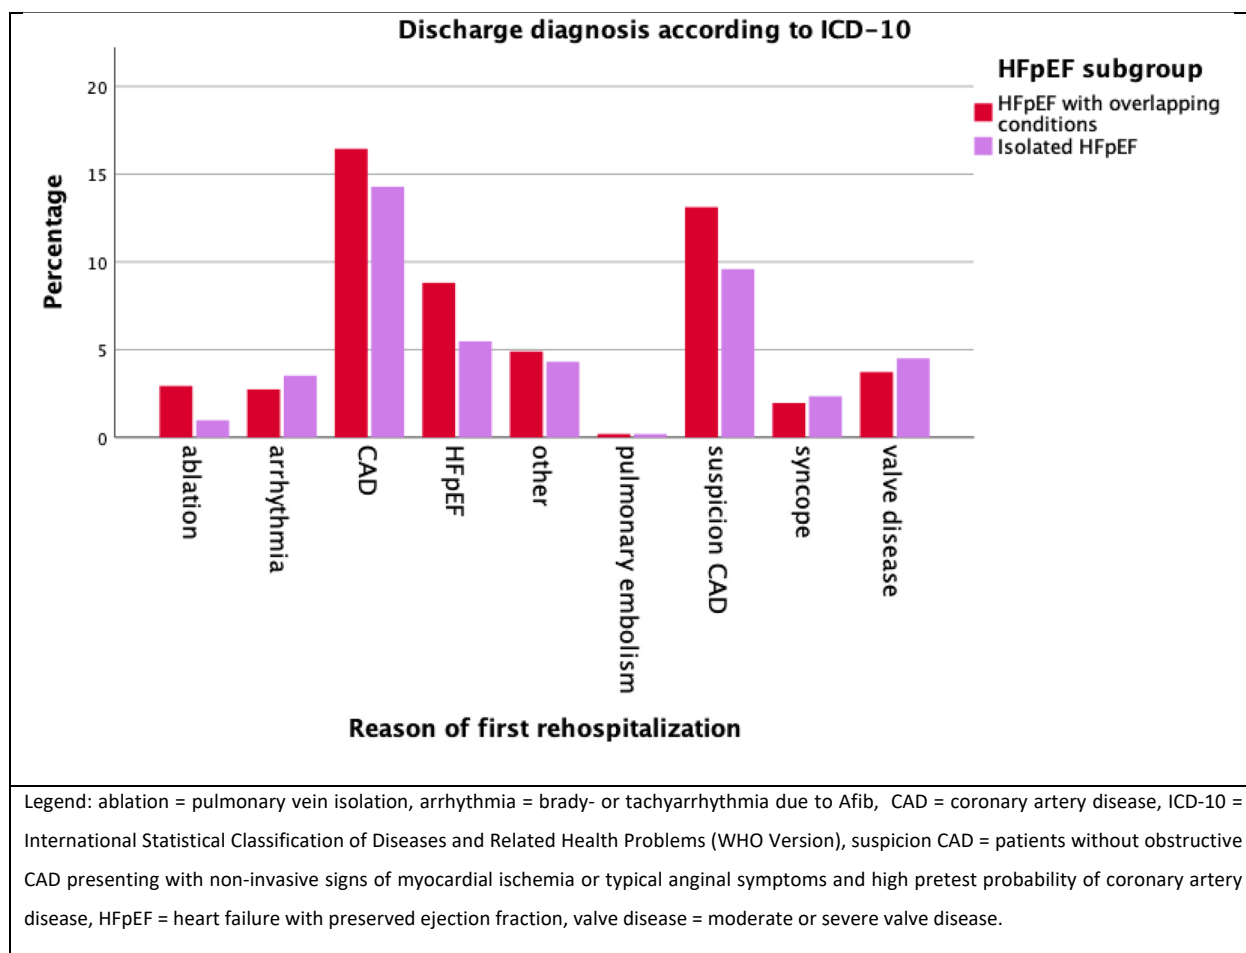

Figure S3. ROC curves for HFpEF hospitalization and death in overall cohort, CAD subgroup and Non-CAD subgroup.

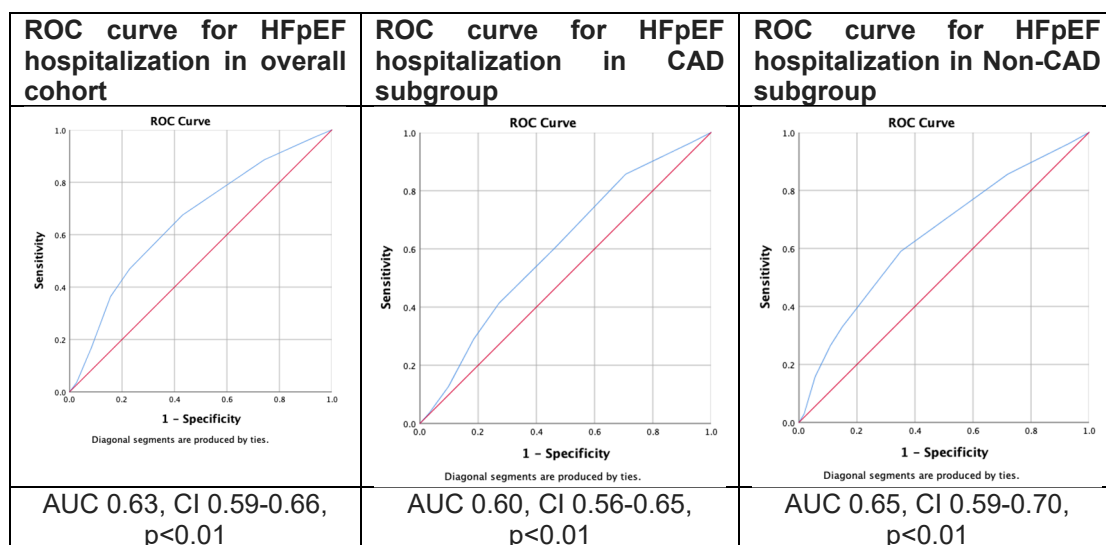



Figure S4. KM-estimates for isolated HFpEF and HFpEF with overlapping conditions in H<sub>2</sub>FpEF score high risk group.

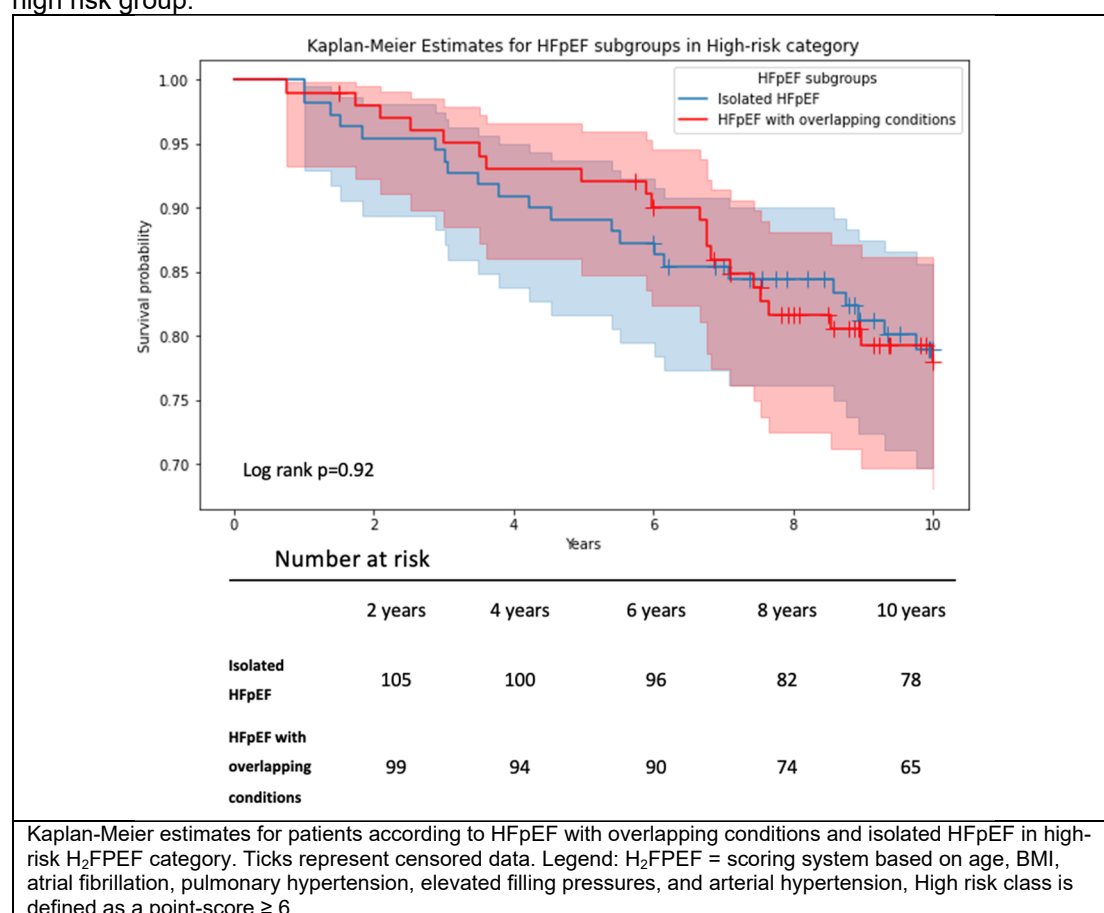

Supplement: s1 [file s1]
